# Supplementary material
Source: PubMed Central journal article supplement (PMC170954)
Supplement: pnas_1033001100_3.pdf [file pnas_1033001100_3.pdf]

**Table 2. RNA expression ratios of iron-regulated genes identified by microarray analysis and biochemical verification of Fur binding by electrophoretic mobility shift assay (EMSA) with *Escherichia coli* and *Neisseria* Fur.**

| Transcriptional unit *                    | EMSA <sup>+</sup>  |               |                    |                      | Microarray relative quantification # (RNA expression ratios Fe/Df) at |                               |                               |                               |                               |                              |                               |                               |
|-------------------------------------------|--------------------|---------------|--------------------|----------------------|-----------------------------------------------------------------------|-------------------------------|-------------------------------|-------------------------------|-------------------------------|------------------------------|-------------------------------|-------------------------------|
|                                           | Fur box prediction | Tested region | <i>E. coli</i> Fur | <i>Neisseria</i> Fur | 15m                                                                   | 30m                           | 60m                           | 90m                           | 2h                            | 3h                           | 4h                            | 5h                            |
| <i>fbpA</i>                               | +                  | -180/+5       | +                  | +                    | 0.40                                                                  | 0.51                          | 0.60                          | 0.63                          | 0.69                          | 0.52                         | 0.65                          | 0.84                          |
| NMB0034-0035                              | +                  | -145/-8       | +                  | +                    | 0.57-0.49                                                             | 0.47-0.33                     | 0.55-0.37                     | 0.34-0.28                     | 0.36-0.28                     | 0.35-0.24                    | 0.37-0.31                     | 0.41-0.42                     |
| NMB0036                                   | -                  | -157/-1       | -                  | -                    | 0.89                                                                  | 0.66                          | 0.82                          | 0.42                          | 0.50                          | 0.44                         | 0.47                          | 0.56                          |
| <i>kat</i>                                | +                  | -124/-6       | +                  | +                    | 1.62                                                                  | 2.71                          | 1.32                          | 1.37                          | 1.44                          | 1.36                         | 0.93                          | 0.99                          |
| <i>nsgA</i>                               | +                  | -99/+1        | +                  | +                    | 2.43                                                                  | 11.52                         | 6.75                          | 7.00                          | 3.91                          | 3.47                         | 3.70                          | 3.89                          |
| NMB0744                                   | +                  | -135/-23      | +                  | +                    | 0.32                                                                  | 0.24                          | 0.28                          | 0.23                          | 0.20                          | 0.19                         | 0.24                          | 0.26                          |
| NMB0866-0865-0864                         | +                  | -127/-2       | +                  | +                    | 0.83-0.38-0.64                                                        | 0.66-0.35-0.58                | 0.68-0.25-0.41                | 0.52-0.17-0.28                | 0.56-0.17-0.31                | 0.57-0.16-0.33               | 0.68-0.17-0.25                | 0.66-0.18-0.29                |
| NMB1436-1437-1438                         | +                  | -345/-142     | +                  | +                    | 2.18-2.52-1.90                                                        | 2.92-3.44-3.15                | 2.21-2.79-2.29                | 3.02-3.79-3.14                | 2.94-4.07-3.30                | 2.67-3.67-2.88               | 2.25-2.96-2.59                | 2.26-3.13-2.57                |
| <i>aniA</i>                               | +                  | -58/+24       | +                  | +                    | 1.98                                                                  | 2.59                          | 1.99                          | 1.66                          | 2.11                          | 1.89                         | 2.16                          | 1.25                          |
| <i>mdaB</i>                               | +                  | -198/-18      | +                  | +                    | 1.02                                                                  | 0.64                          | 0.63                          | 0.49                          | 0.37                          | 0.44                         | 0.45                          | 0.56                          |
| NMB0101                                   | +                  | -197/+19      | nd                 | +                    | 0.66                                                                  | 0.46                          | 0.49                          | 0.52                          | 0.72                          | 0.77                         | 0.61                          | 0.62                          |
| <i>dsbA-2</i>                             | -                  | -131/-33      | +                  | +                    | 0.71                                                                  | 0.51                          | 0.56                          | 0.58                          | 0.61                          | 0.52                         | 0.50                          | 0.60                          |
| NMB0317                                   | +                  | -133/-17      | +                  | +                    | 0.81                                                                  | 0.25                          | 0.37                          | 0.33                          | 0.45                          | 0.40                         | 0.53                          | 0.78                          |
| <i>lspA-NMB0343</i>                       | +                  | -200/+20      | nd                 | +                    | 0.86-0.72                                                             | 0.63-0.75                     | 0.68-0.65                     | 0.84-0.61                     | 0.78-0.49                     | 0.97-0.58                    | 0.78-0.76                     | 0.81-0.65                     |
| <i>fnr</i>                                | -                  | -200/+20      | nd                 | -                    | 0.85                                                                  | 0.68                          | 0.56                          | 0.67                          | 0.64                          | 0.61                         | 0.48                          | 0.53                          |
| <i>nadA</i>                               | +                  | -181/+28      | +                  | +                    | 1.03                                                                  | 1.14                          | 0.75                          | 0.47                          | 0.53                          | 0.40                         | 0.31                          | 0.31                          |
| <i>nadC</i>                               | +                  | -203/-46      | +                  | +                    | 1.01                                                                  | 0.91                          | 0.85                          | 0.63                          | 0.71                          | 0.57                         | 0.50                          | 0.70                          |
| NMB0584-0585                              | +                  | -109/+9       | +                  | +                    | 1.12-0.64                                                             | 1.32-0.54                     | 0.91-0.65                     | 0.80-0.62                     | 0.75-0.60                     | 0.47-0.57                    | 0.42-0.65                     | 0.26-0.69                     |
| <i>recN</i>                               | +                  | -239/-15      | +                  | +                    | 1.12                                                                  | 1.32                          | 0.91                          | 0.80                          | 0.75                          | 0.47                         | 0.42                          | 0.26                          |
| NMB0808-0807-0806                         | -                  | -200/+19      | nd                 | -                    | 1.03-0.93-0.93                                                        | 1.26-0.75-1.38                | 1.12-0.85-0.95                | 0.89-0.89-1.05                | 0.91-1.15-1.05                | 0.71-0.75-0.90               | 0.67-0.91-1.21                | 0.5-0.47-0.80                 |
| NMB0821                                   | -                  | -200/+20      | nd                 | -                    | 1.55                                                                  | 1.11                          | 1.00                          | 0.72                          | 0.76                          | 0.54                         | 0.50                          | 0.39                          |
| NMB0977                                   | -                  | -200/+20      | nd                 | -                    | 0.97                                                                  | 0.78                          | 0.69                          | 0.58                          | 0.39                          | 0.28                         | 0.24                          | 0.31                          |
| <i>cysG1-cysH1-cysD1-cysN1-cysJ1-ysl1</i> | -                  | -200/+20      | nd                 | -                    | 1.04-1.00-0.98-0.99-1.08-1.05                                         | 1.09-1.55-0.98-1.17-0.95-0.95 | 0.72-0.53-0.76-0.49-0.66-0.63 | 0.48-0.36-0.48-0.47-0.64-0.71 | 0.86-0.79-0.82-0.89-1.06-1.15 | 0.85-0.88-0.84-1.00-1.21-1.4 | 1.34-1.15-1.09-1.16-1.35-1.34 | 1.01-1.03-1.09-1.10-1.13-1.06 |
| NMB1340- <i>pdhA</i>                      | +                  | -152/-40      | +                  | +                    | 0.66-0.97                                                             | 1.30-1.11                     | 0.60-1.34                     | 0.46-1.03                     | 0.60-0.98                     | 0.71-0.70                    | 0.60-0.82                     | 0.67-0.98                     |

|                                        |   |          |    |   |                          |                          |                          |                          |                          |                          |                          |                          |
|----------------------------------------|---|----------|----|---|--------------------------|--------------------------|--------------------------|--------------------------|--------------------------|--------------------------|--------------------------|--------------------------|
| <b><i>lldD</i></b>                     | + | -80/+22  | +  | + | 0.25                     | 0.18                     | 0.26                     | 0.24                     | 0.23                     | 0.21                     | 0.23                     | 0.29                     |
| <b><i>nifU-1381</i></b>                | + | -79/-5   | +  | + | 0.82-0.63                | 0.7-0.46                 | 0.76-0.53                | 0.67-0.53                | 0.63-0.49                | 0.56-0.46                | 0.58-0.45                | 0.45-0.42                |
| <b>NMB1395</b>                         | + | -200/+20 | nd | + | 0.53                     | 0.59                     | 0.41                     | 0.39                     | 0.50                     | 0.57                     | 0.63                     | 0.73                     |
| <b>NMB1402-1403-1404-1405</b>          | + | -111/-2  | +  | + | 1.07-0.94-0.96-0.35      | 1.04-0.96-0.95-0.29      | 0.99-0.92-0.97-0.26      | 0.92-0.94-0.98-0.32      | 0.99-0.97-0.99-0.37      | 1.00-1.11-1.01-0.47      | 0.98-0.82-0.93-0.45      | 0.89-0.92-0.89-0.59      |
| <b>NMB1412</b>                         | + | -109/+9  | +  | + | 0.57                     | 0.42                     | 0.44                     | 0.40                     | 0.43                     | 0.45                     | 0.41                     | 0.51                     |
| <b>NMB1414-<i>frpC</i></b>             | + | -132/-23 | +  | + | 0.64-0.40                | 0.49-0.26                | 0.56-0.31                | 0.48-0.32                | 0.52-0.30                | 0.56-0.41                | 0.49-0.36                | 0.57-0.46                |
| <b><i>fumC</i></b>                     | - | -107/-3  | +  | + | 0.36                     | 0.28                     | 0.32                     | 0.29                     | 0.28                     | 0.22                     | 0.29                     | 0.39                     |
| <b>NMB1490</b>                         | - | -200/+20 | nd | - | 0.74                     | 1.00                     | 0.53                     | 0.46                     | 0.40                     | 0.52                     | 0.74                     | 0.77                     |
| <b>NMB1492-1491</b>                    | - | -200/+20 | nd | + | 0.95-0.93                | 1.28-1.26                | 1.15-1.15                | 1.02-1.02                | 1.03-0.98                | 0.81-0.91                | 0.53-0.51                | 0.51-0.46                |
| <b>NMB1727</b>                         | - | -107/-1  | nd | - | 0.81                     | 0.94                     | 0.64                     | 0.61                     | 0.69                     | 0.76                     | 0.50                     | 0.54                     |
| <b>NMB1798</b>                         | - | -200/+20 | nd | + | 0.59                     | 0.31                     | 0.39                     | 0.50                     | 0.64                     | 0.73                     | 0.68                     | 0.52                     |
| <b><i>mfp-1899</i></b>                 | + | -153/-54 | +  | + | 0.92-0.98                | 1.03-0.99                | 0.66-0.97                | 0.55-0.82                | 0.65-0.88                | 0.48-0.79                | 0.40-0.89                | 0.34-0.78                |
| <b><i>secY-infA-rpmJ</i></b>           | + | -37/+136 | +  | + | 0.60-0.95-1.17           | 1.07-0.62-0.82           | 1.12-1.18-1.26           | 1.07-1.83-1.69           | 1.81-1.79-1.66           | 2.61-2.16-2.03           | 2.83-1.69-1.44           | 1.69-1.84-1.91           |
| <b><i>nuoA-nuoB-nuoC-nuoD-nuoE</i></b> | + | -197/-14 | +  | + | 1.21-1.50-1.16-2.11-1.10 | 1.27-2.65-1.42-3.36-1.42 | 1.25-1.65-1.16-2.09-1.16 | 1.42-2.14-1.41-2.84-1.54 | 1.46-2.28-1.24-2.72-1.43 | 1.22-2.15-1.10-2.96-1.47 | 1.32-2.36-1.36-3.30-1.46 | 1.14-1.88-1.19-2.53-1.38 |
| <b>NMB0296-0297-0298</b>               | + | -227/-49 | +  | + | 0.98-1.03-1.94           | 1.02-1.24-1.37           | 0.76-0.80-2.85           | 0.83-0.94-2.82           | 0.88-1.01-2.08           | 0.77-1.32-2.33           | 0.66-1.24-2.43           | 0.60-1.14-3.67           |
| <b><i>sodB</i></b>                     | - | -56/-241 | +  | + | 3.43                     | 6.52                     | 5.62                     | 5.69                     | 4.38                     | 4.31                     | 4.56                     | 3.91                     |
| <b>NMB1804-1803</b>                    | - | -159/-18 | -  | - | 1.25-1.40                | 0.90-1.53                | 1.31-1.94                | 1.44-2.63                | 1.44-2.10                | 1.61-2.58                | 1.70-2.47                | 1.30-1.94                |
| <b>NMB1866</b>                         | + | -190/-1  | -  | - | 1.85                     | 2.35                     | 2.27                     | 3.97                     | 2.83                     | 3.15                     | 2.90                     | 3.37                     |

\*) Transcriptional units found regulated in iron-replet vs. iron-starved cultures. The regulated genes, belonging to the transcriptional unit, are indicated in bold.

+) The 400-bp upstream regions of the regulated transcriptional units were searched for the presence of a Fur-binding site, using the *E. coli* Fur consensus sequence, the *Neisseria* Fur consensus sequence, the (NATWAT)<sub>3</sub> sequence, recently proposed as the *E. coli* Fur-box, and the Fur-binding sequences of the *Neisseria gonorrhoeae* fur and fbpA genes. In the table are reported the promoter regions tested by EMSA, with respect to ATG, and the binding ability of *E. coli* and *Neisseria* Fur.

#) Expression ratios of each gene composing the transcriptional units, in iron-repleted vs. iron-starved cultures at different time points.
