# Supplementary material
Source: PubMed Central journal article supplement (PMC170954)

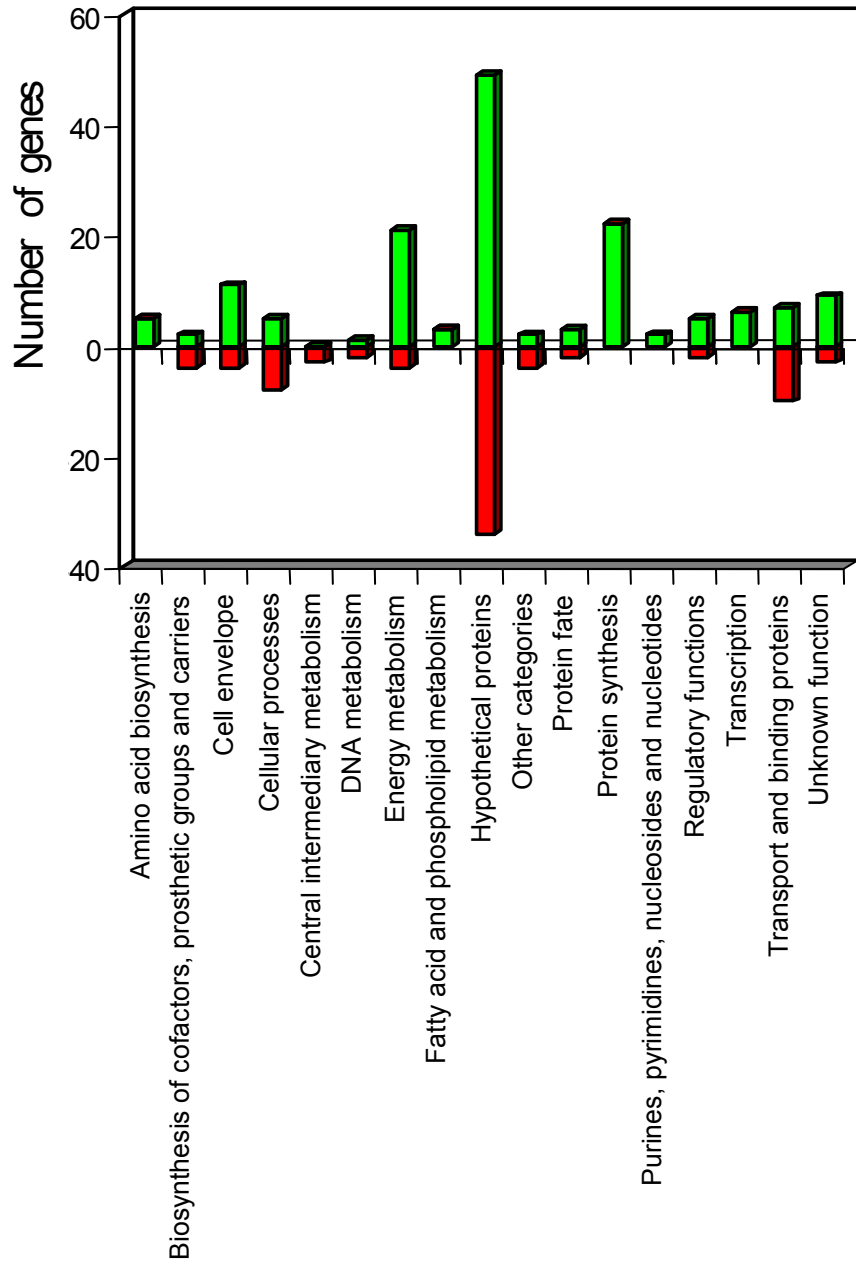

Supplement: pnas_1033001100_2.pdf [file pnas_1033001100_2.pdf]
